# Supplementary material for: Molecular engineering for high-performance fullerene broadband photodetectors
Source: Royal Society of Chemistry journal article supplement (doi:10.1039/d0na00981d), 2020-12-31
Supplement: d0na00981d1.pdf [file d0na00981d1.pdf]

Electronic Supplementary Material (ESI) for Nanoscale Advances.  
This journal is © The Royal Society of Chemistry 2020.

## Molecular Engineering for High-Performance Fullerene

### Broadband Photodetector

Mingming Su, Yajing Hu, Ao Yu, Zhiyao Peng, Wangtao Long, Shixin Gao, Ping Peng,\*  
Bing Su, Fang-Fang Li\*

State Key Laboratory of Materials Processing and Die & Mould Technology, School of  
Materials Science and Engineering, Huazhong University of Science and Technology,  
Wuhan 430074, China

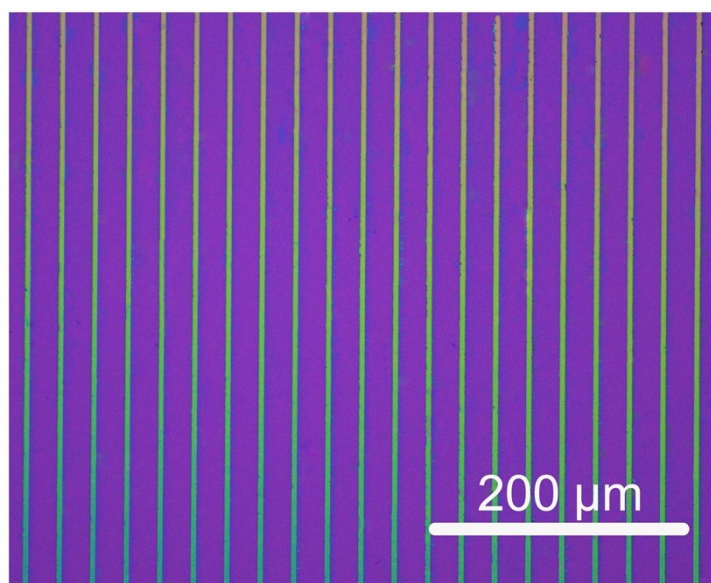

**Figure S1** Optical image of large-scale microwire arrays of NiTPP-C<sub>60</sub>.

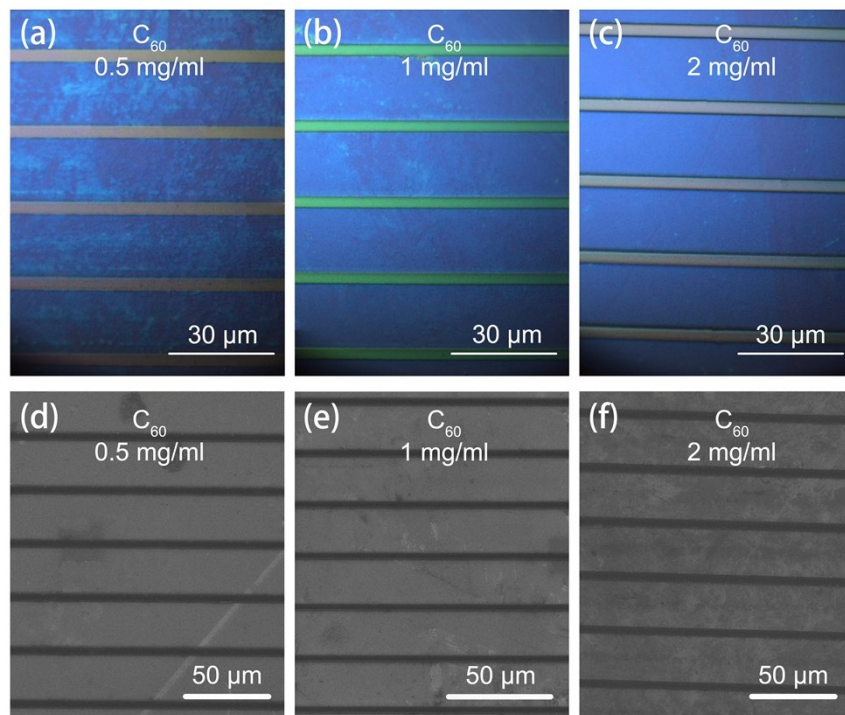

**Figure S2** Optical images of (a)  $C_{60}$  (0.5 mg/ml), (b)  $C_{60}$  (1 mg/ml) and (c)  $C_{60}$  (2 mg/ml) microwire arrays. SEM images of (d)  $C_{60}$  (0.5 mg/ml), (e)  $C_{60}$  (1 mg/ml) and (f)  $C_{60}$  (2 mg/ml) microwire arrays.

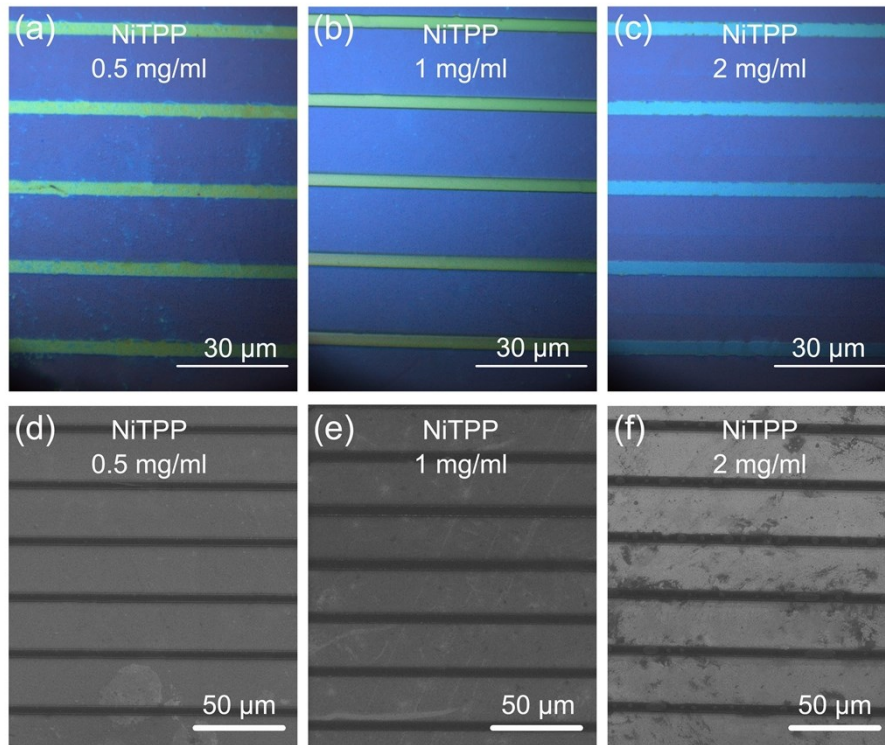

**Figure S3** Optical images of (a) NiTPP (0.5 mg/ml), (b) NiTPP (1 mg/ml) and (c) NiTPP (2 mg/ml) microwire arrays. SEM images of (d) NiTPP (0.5 mg/ml), (e) NiTPP (1 mg/ml) and (f) NiTPP (2 mg/ml) microwire arrays.

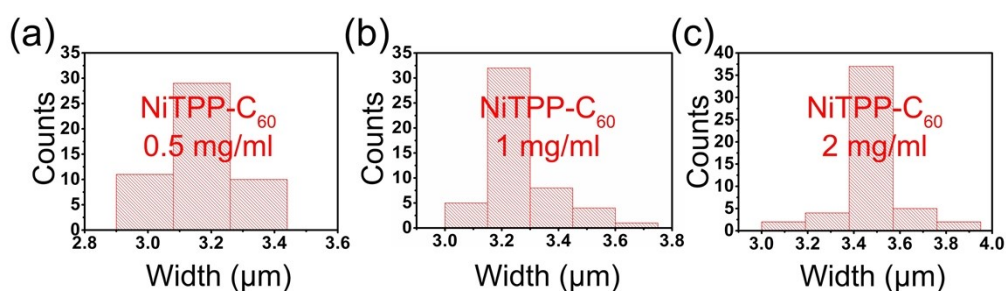

**Figure S4** Width distribution of NiTPP-C<sub>60</sub> microwire arrays prepared at different concentrations, (a) 0.5 mg/ml, (b) 1 mg/ml, (c) 2 mg/ml.

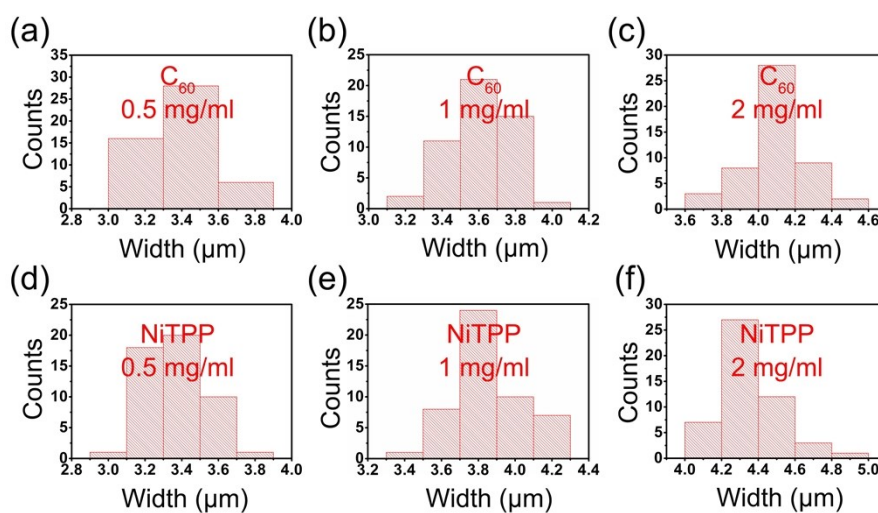

**Figure S5** Width distribution of C<sub>60</sub> (a-c) and NiTPP (d-f) microwire arrays at different concentrations.

**Table S1** Width statistics of C<sub>60</sub>, NiTPP and NiTPP-C<sub>60</sub> microwires with different concentrations.

| Concentration<br>(mg/ml) | Width (μm)/C <sub>60</sub> |      |      | Width (μm)/NiTPP |      |      | Width (μm)/NiTPP-C <sub>60</sub> |      |      |
|--------------------------|----------------------------|------|------|------------------|------|------|----------------------------------|------|------|
|                          | min                        | max  | ave  | min              | max  | ave  | min                              | max  | ave  |
| 0.5                      | 3.04                       | 3.83 | 3.39 | 3.08             | 3.85 | 3.37 | 2.94                             | 3.41 | 3.13 |
| 1                        | 3.25                       | 4.19 | 3.59 | 3.41             | 4.19 | 3.85 | 3.07                             | 3.69 | 3.27 |
| 2                        | 3.69                       | 4.46 | 4.07 | 4.06             | 4.87 | 4.37 | 3.07                             | 3.85 | 3.47 |

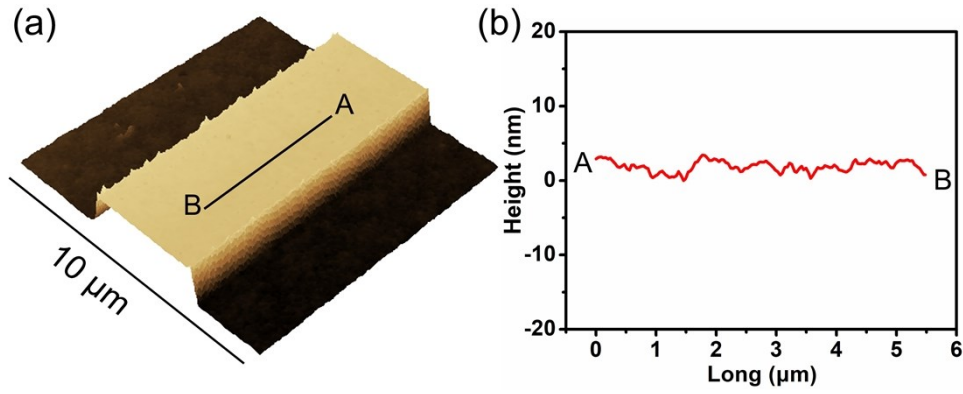

**Figure S6** (a) AFM image of NiTPP-C<sub>60</sub> microwire and (b) the corresponding longitudinal height distribution.

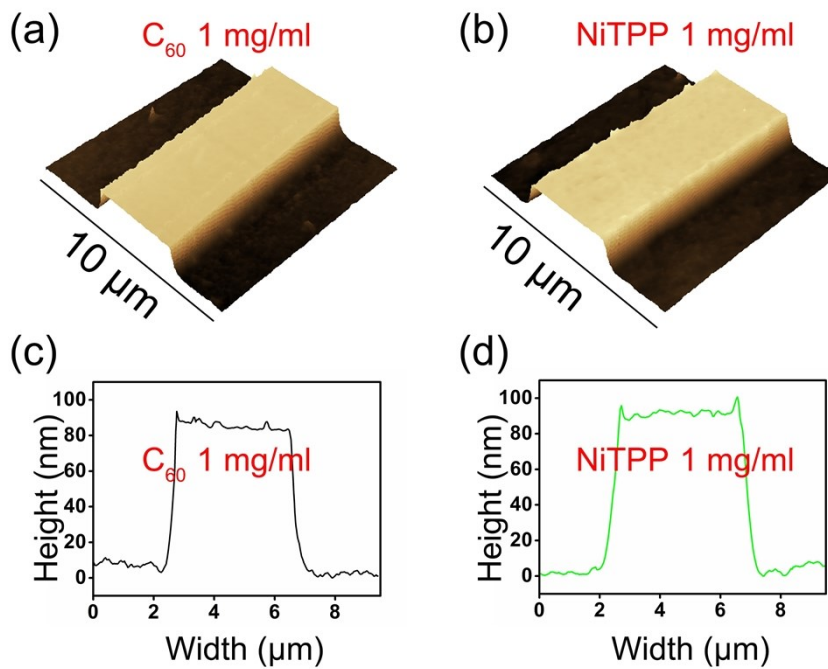

**Figure S7** (a-b) AFM images of C<sub>60</sub> and NiTPP microwires. (c-d) Height distribution of C<sub>60</sub> and NiTPP microwires.

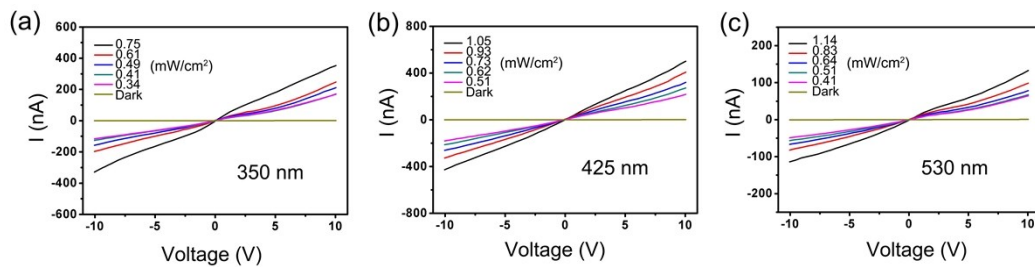

**Figure S8** *I-V* curves of the NiTPP-C<sub>60</sub> microwires (1 mg/ml) device measured at room temperature in dark and under illumination with (a) 350 nm UV light, (b) 425 nm light and (c) 530 nm light.

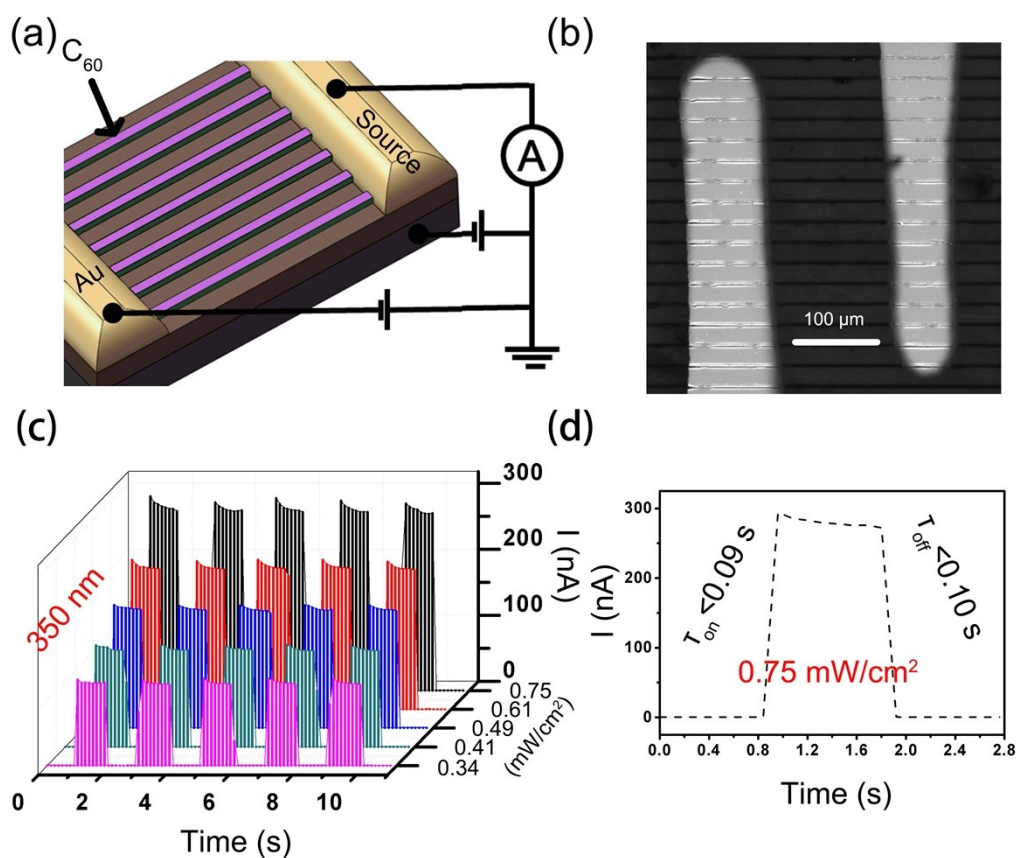

**Figure S9** (a) Schematic diagram of the photodetector device based on microwire arrays grown from 1 mg/ml  $C_{60}$ , (b) SEM image of the corresponding device. (c)  $I$ - $T$  curves of the photodetector measured at room temperature in dark and under illumination at 350 nm UV light and different optical power densities. (d) single-cycle optical response of the device at 350 nm UV light and 0.75 mW/cm<sup>2</sup> optical power density. The effective light-receiving area is for all photoelectric detection devices is  $7.75 \times 10^{-5}$  cm<sup>2</sup>, and  $V_{GS} = V_{DS} = 10$  V.

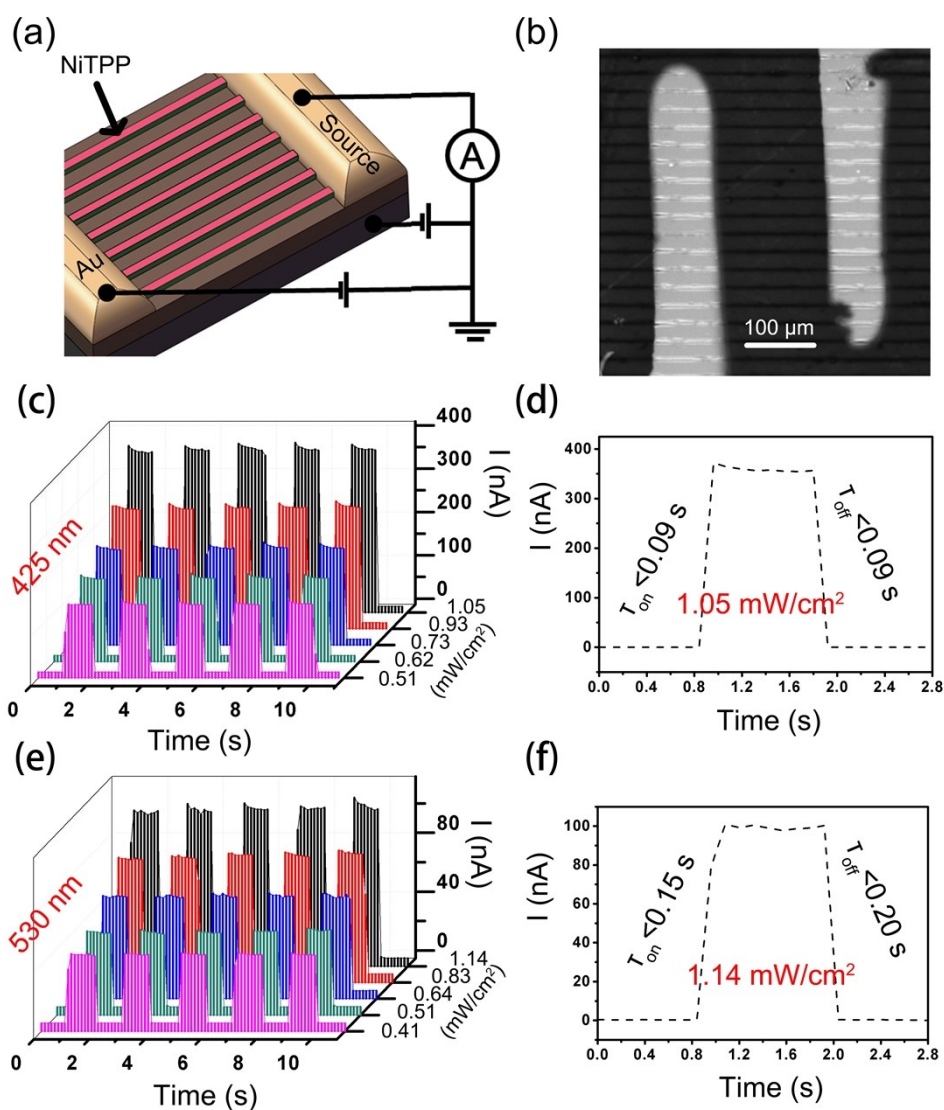

**Figure S10** (a) Schematic diagram of the photodetector device based on microwire arrays grown from 1 mg/mL NiTPP, (b) SEM image of the corresponding device. (c, e)  $I$ - $T$  curves of the NiTPP (1 mg/ml) microwires measured at room temperature in dark and under different light irradiation. (d, f) Single-cycle optical response of the device at 425 nm and 530 nm, where the optical power density is 1.05 and 1.14  $\text{mW}/\text{cm}^2$ , respectively. The effective light-receiving area for all photoelectric detection devices is  $8.62 \times 10^{-5} \text{ cm}^2$ , and  $V_{\text{GS}} = V_{\text{DS}} = 10 \text{ V}$ .

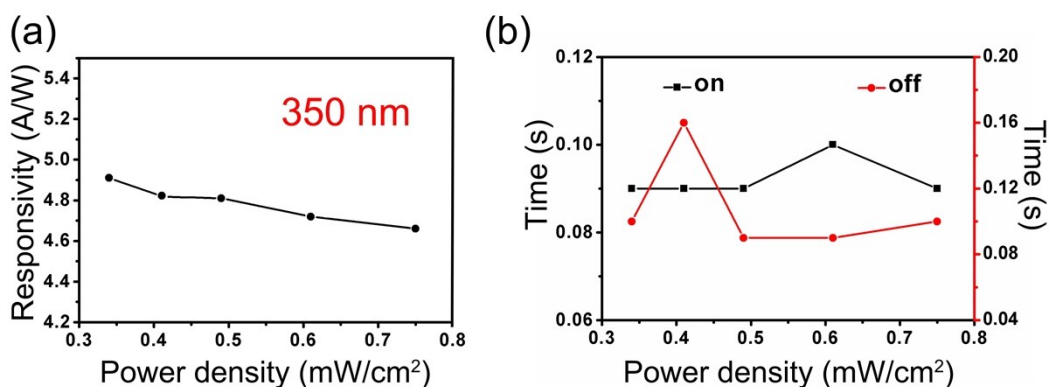

**Figure S11** Responsivity of (a) C<sub>60</sub> (1 mg/ml) microwires at 350 nm UV light under different optical power densities. Rise and decay time of (b) C<sub>60</sub> (1 mg/ml) microwires at 350 nm UV light under different optical power densities.

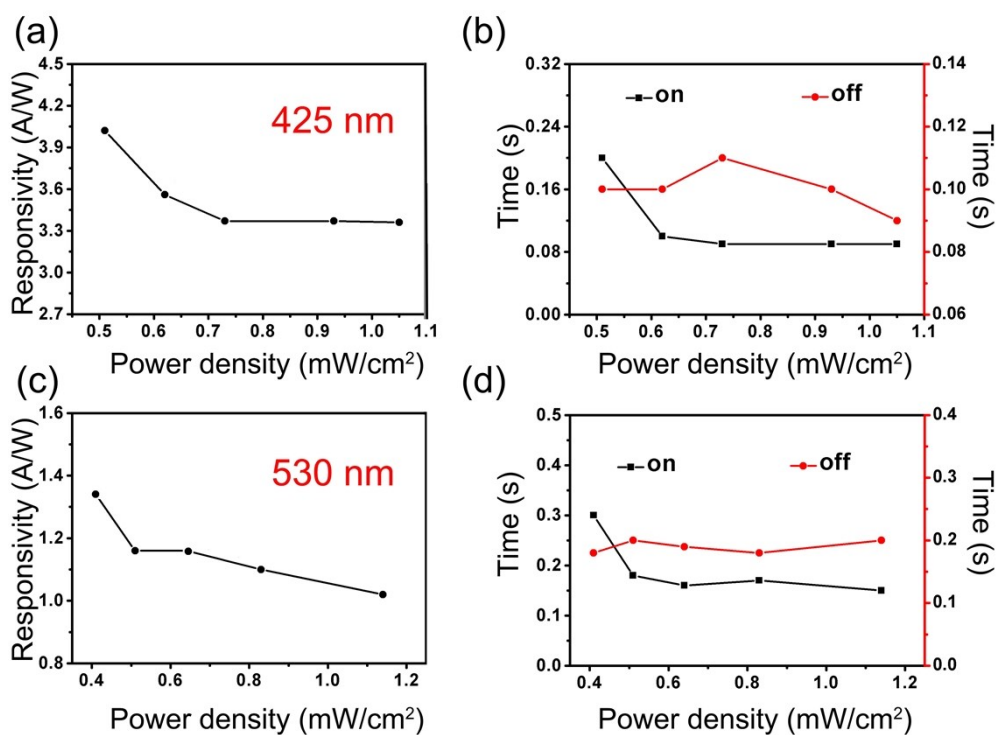

**Figure S12** Responsivity of NiTPP microwires (1 mg/ml) (a) at 425 nm light and (c) at 530 nm light under different optical power densities. Rise and decay time of NiTPP microwires (1 mg/ml) (b) at 425 nm and (d) at 530 nm light under different optical power densities.
